# Supplementary material for: Prediction of heart failure 1 year before diagnosis in general practitioner patients using machine learning algorithms: a retrospective case–control study
Source: HighWire-hosted journal article supplement (doi:10.1136/bmjopen-2021-060458), 2022-08-01
Supplement: bmjopen-2021-060458supp003_data_supplement.pdf [file bmjopen-2021-060458supp003_data_supplement.pdf]

## Appendix C. Correlation coefficients

**Table C1.** Pearson correlation coefficient between the 20 variables with the highest weight in the logistic regression model on the extended non-sequential dataset and the outcome.

| <b>Name</b>                                 | <b>Correlation</b> |
|---------------------------------------------|--------------------|
| Age                                         | 0.306              |
| GP visit 1-2 month                          | 0.118              |
| GP visit 2-3 month                          | 0.136              |
| Asked for side-effects medication DM type 2 | 0.034              |
| Chronic non-specified anemia                | 0.090              |
| Analgesics                                  | 0.105              |
| Chronic senile dementia                     | -0.000             |
| Tested monofilaments left foot              | 0.060              |
| Tested HDL-cholesterol                      | -0.017             |
| Tested blood sediment                       | 0.084              |
| Female                                      | 0.026              |
| Chronic (diabetes) ulcer                    | 0.101              |
| Chronic acute myocardial infarction         | 0.106              |
| Beta blocking agents                        | 0.194              |
| Tested urea                                 | 0.067              |
| Chronic seborrheic eczema                   | 0.010              |
| Antithrombotic agents                       | 0.286              |
| Chronic iron deficiency anemia              | 0.082              |
| Tested glycohemoglobine                     | 0.082              |
| Control visit DM type 2                     | 0.043              |

**Table C2.** Pearson correlation coefficient between the 20 variables with the highest weight in the logistic regression model on the complete dataset and the outcome.

| <b>Name</b>                                                             | <b>Correlation</b> |
|-------------------------------------------------------------------------|--------------------|
| Age                                                                     | 0.306              |
| Chronic acute myocardial infarction                                     | 0.106              |
| Low diastolic BP with chronic hypertension without organ damage         | -0.01              |
| Chronic senile dementia                                                 | -0.000             |
| Advice to stop smoking                                                  | 0.033              |
| Test for albumin blood                                                  | 0.066              |
| Asked for sexual dysfunction                                            | 0.008              |
| Test for iron                                                           | 0.089              |
| Aspartateaminotransferasis                                              | 0.017              |
| Ankle oedema                                                            | 0.098              |
| Chronic atrial fibrillation                                             | 0.200              |
| High LDL cholesterol                                                    | -0.080             |
| Normal weight followed by normal length                                 | 0.029              |
| Vitamins                                                                | 0.115              |
| Chronic arthrosis of the knee                                           | 0.065              |
| Beta blocking agents followed by high diastolic BP                      | 0.096              |
| Antiacids with chronic diabetes followed by visit for diabetes          | 0.099              |
| Asked for severity of dyspnea                                           | 0.036              |
| RAAS agents followed by normal systolic BP followed by low diastolic BP | 0.063              |
| RAAS agents followed by low systolic BP followed by normal systolic BP  | 0.064              |
